# Supplementary material
Source: Springer Nature journal article supplement (https://www.springermedizin.de/resource/supplementary/12916_2013_875_MOESM2_ESM.pdf/9598550)
Supplement: MOESM2 [file 9598550]

**Table 1.** Major resistance pathways for currently available INSTIs

| <b>Raltegravir/Elvitegravir</b>                                                                                                                                     | <b>Dolutegravir</b> |
|---------------------------------------------------------------------------------------------------------------------------------------------------------------------|---------------------|
| <b>Y143 pathway</b><br>Y143C<br>Y143R<br>T97A/Y143C<br>T97A/Y143R<br>L74M/T97A/Y143G<br>L74M/T97A/E138A/Y143C                                                       | R263K               |
| <b>N155H pathway</b><br>N155H<br>L74M/N155H<br>E92Q/N155H                                                                                                           |                     |
| <b>E92Q pathway</b><br>E92Q<br>T66I/E92Q<br>E92Q/S153A<br>E92Q/H51Y/L768V                                                                                           |                     |
| <b>Q148 pathway</b><br>Q148H<br>Q148K<br>Q148R<br>E138K/Q148H<br>E138K/Q148K<br>E138K/Q148R<br>G140S/Q148H<br>G140S/Q148K<br>G140S/Q148R<br>E138A/G140S/Y143H/Q148H |                     |
